# Supplementary material
Source: publisher site journal article supplement (https://www.dovepress.com/get_supplementary_file.php?f=493838.xlsx)
Supplement: Supplementary file 1 [file get_supplementary_file.php]

## Sheet: SPSS
Reasons Why Patients Do Not Return to Sport Post ACL Reconstruction
id number	Age	Gender	Height	H in meters	Weight	BMI	ACL side	Associated injury (only meniscal tear )	Smoking	Completed rehabilitation	Have you returned to your previous level of activity before you tore your ACL?	Knee symptoms-related reason	Knee feels unstable	Lack of motion	Knee hurts with activities	Knee or leg muscles feel weak	Knee swells	Life-related reason	Job requirements	Due to demands of education	Marital status change	Choice-related reason	Not intrested in playing at same level	No time	Fear of reinjury	Was told not to return to same level
1	44	1	173	1.73	100	33.4124	2	1	1	1	0	1	0	0	1	1	0	0				1	0	0	1	0
2	33	1	175	1.75	64	20.898	2	1	1	0	0	1	0	0	1	1	0	1	1	0	0	1	0	1	1	1
3	24	2	156	1.56	61	25.0657	2	1	0	1	1
4	43	1	175	1.75	95	31.0204	1	1	1	1	0	1	1	1	1	0	1	0				1	0	0	1	1
5	39	1	174	1.74	71	23.4509	1	0	1	1	0	1	0	0	0	1	0	0				0
6	39	1	165	1.65	78	28.6501	2	1	0	0	0	1	1	0	1	0	0	0				1	0	0	1	0
7	24	1	183	1.83	78	23.2912	1	0	1	0	0	1	0	0	1	1	0	0				1	0	0	1	0
8	45	1	183	1.83	84	25.0829	1	1	1	0	0	1	1	1	1	1	1	0				1	0	0	1	0
9	28	1	160	1.6	100	39.0625	1	1	1	1	1
10	25	1	173	1.73	68	22.7204	1	0	1	0	0	1	0	0	1	1	0	1	1	0	0	1	1	1	1	0
11	53	1	180	1.8	80	24.6914	1	1	1	1	1
12	40	1	176	1.76	82	26.4721	1	1	0	0	0	1	0	0	1	0	1	1	1	0	0	1	1	0	1	0
13	33	1	176	1.76	62	20.0155	1	1	1	1	0	1	0	0	0	1	0	0				0
14	26	1	178	1.78	80	25.2493	2	1	1	1	0	1	0	0	1	1	0	0				1	0	0	1	1
15	23	1	183	1.83	70	20.9024	1	1	1	1	1
16	42	1	186	1.86	130	37.5766	1	1	0	1	0	1	0	0	1	1	1	0				1	0	0	1	0
17	22	1	190	1.9	50	13.8504	1	1	1	1	0	1	0	1	1	1	0	0				1	0	0	1	0
18	31	1	170	1.7	81	28.0277	2	1	1	0	1
19	28	1	165	1.65	72	26.4463	2	1	1	0	0	1	1	0	1	0	0	1	1	0	0	1	0	0	1	0
20	34	1	178	1.78	75	23.6713	1	0	1	1	0	0						0				1	0	0	1	0
21	45	1	165	1.65	65	23.8751	2	1	1	1	0	1	1	1	1	1	0	0				1	1	0	0	0
22	45	2	153	1.53	59	25.204	2	1	0	0	0	1	0	0	1	1	0	1	1	0	0	1	1	0	0	0
23	24	1	165	1.65	74	27.1809	2	1	1	1	0	1	1	0	1	1	0	1	1	0	0	1	0	0	1	0
24	22	1	182	1.82	86	25.963	2	0	0	1	1
25	44	1	190	1.9	120	33.241	1	1	1	0	0	1	1	1	1	1	1	0				1	0	0	1	0
26	22	2	163	1.63	52	19.5717	1	1	0	1	0	0						0				0
27	36	1	170	1.7	90	31.1419	2	1	0	1	0	1	1	0	1	1	0	0				1	0	0	1	0
28	24	1	167	1.67	77	27.6095	1	0	0	1	1
29	24	1	175	1.75	85	27.7551	2	0	1	1	0	0						0				1	0	0	1	0
30	28	1	165	1.65	75	27.5482	2	1	0	0	0	1	0	0	1	1	0	0				1	0	0	1	0
31	32	1	178	1.78	68	21.4619	2	1	0	1	0	0						0				1	0	0	1	0
32	40	2	169	1.69	76	26.6097	1	0	0	1	1
33	49	1	170	1.7	70	24.2215	1	1	1	1	0	1	0	0	0	1	1	0				0
34	22	1	183	1.83	88	26.2773	2	0	0	1	1
35	43	1	187	1.87	127	36.3179	2	1	1	0	0	1	0	0	1	1	1	0				1	0	0	1	0
36	52	2	167	1.67	73	26.1752	2	1	0	1	1
37	31	1	179	1.79	68	21.2228	2	0	1	1	0	1	0	0	1	1	0	1	1	0	1	1	1	1	1	0
38	56	2	163	1.63	68	25.5937	1	1	0	1	0	1	0	0	1	0	1	0				1	0	0	1	0
39	32	1	163	1.63	79	29.7339	2	1	1	0	0	1	0	0	1	0	0	0				1	0	1	1	0
40	22	1	179	1.79	82	25.5922	1	1	0	1	0	0						0				1	0	0	1	0
41	43	1	173	1.73	70	23.3887	1	0	1	1	0	1	0	0	0	1	0	0				1	0	0	1	0
42	27	1	170	1.7	60	20.7612	1	1	1	1	1
43	24	1	179	1.79	70	21.847	2	0	0	1	1
44	50	1	164	1.64	73	27.1416	1	1	0	1	0	0						0				1	0	0	1	0
45	27	1	182	1.82	83	25.0574	2	1	0	1	0	1	0	0	1	1	1	0				1	0	0	1	0
46	43	1	180	1.8	83	25.6173	1	0	0	0	0	0						0				1	0	0	1	0
47	43	1	180	1.8	83	25.6173	2	0	0	0	1
48	28	1	178	1.78	76	23.9869	1	0	0	1	0	1	1	0	0	1	0	0				0
49	42	1	182	1.82	95	28.6801	1	1	0	0	0	1	0	1	1	0	0	1	1	0	0	1	0	0	1	0
50	38	1	167	1.67	95	34.0636	1	1	0	1	0	0						1	1	0	1	1	1	1	1	0
51	25	1	184	1.84	82	24.2202	1	0	0	1	1
52	23	1	192	1.92	85	23.0577	2	1	0	1	1
53	23	1	192	1.92	85	23.0577	2	1	0	1	1
54	37	1	190	1.9	85	23.5457	2	0	1	0	0	1	1	1	0	1	0	1	1	0	0	1	0	0	1	0
55	37	1	172	1.72	105	35.4922	1	1	1	1	0	1	1	1	1	1	0	0				1	0	0	1	0
56	24	1	180	1.8	79	24.3827	1	0	0	1	1
57	40	1	178	1.78	98	30.9304	1	1	0	1	0	1	0	0	0	1	1	0				1	0	1	0	0
58	35	1	181	1.81	90	27.4717	2	1	0	1	1
59	25	1	175	1.75	98	32	2	0	0	1	0	1	0	1	1	1	0	0				1	0	0	1	0
60	23	1	185	1.85	63	18.4076	1	0	1	1	0	1	0	0	1	1	1	0				1	0	0	1	0
61	23	1	184	1.84	86	25.4017	2	1	0	1	1
62	33	1	175	1.75	85	27.7551	1	0	0	1	0	1	0	0	1	1	0	0				1	0	0	1	0
63	21	1	173	1.73	63	21.0498	1	0	0	1	1
64	30	1	165	1.65	85	31.2213	1	1	0	1	1
65	30	1	170	1.7	110	38.0623	2	1	1	1	0	1	0	1	0	1	0	0				1	0	0	1	0
66	28	1	170	1.7	95	32.872	1	1	1	1	0	0	0	0	0	0	0	0				1	0	0	1	0
67	39	2	151	1.51	60	26.3146	1	1	0	1	1
68	32	1	174	1.74	83	27.4145	1	1	0	1	0	1	0	0	1	0	0	0				1	0	0	1	0
69	31	1	165	1.65	71	26.079	1	1	1	1	0	0	0	0	0	0	0	0				1	0	0	1	0
70	36	2	156	1.56	80	32.8731	2	1	0	1	0	1	0	1	0	0	1	0				0
71	33	1	175	1.75	84	27.4286	1	1	0	1	0	1	0	0	1	1	0	1	1	0	0	0
72	23	1	175	1.75	82	26.7755	1	1	0	1	0	1	0	0	1	1	0	0				1	0	0	1	0
73	39	2	160	1.6	65	25.3906	2	1	0	1	0	1	0	0	1	1	0	1	0	1	0	0
74	40	1	178	1.78	100	31.5617	1	1	1	1	1
75	25	1	173	1.73	80	26.7299	1	1	0	0	0	1	0	0	1	0	0	0				1	0	0	1	0
76	22	1	169	1.69	85	29.7609	1	1	0	1	0	0	0	0	0	0	0	0				1	0	0	1	0
77	27	1	174	1.74	100	33.0295	1	1	0	1	0	1	0	0	0	1	0	0				0
78	24	1	171	1.71	74	25.3069	1	1	1	1	1
79	41	1	170	1.7	95	32.872	2	1	1	0	0	1	0	0	1	0	0	1	1	0	0	1	0	0	1	0
80	19	1	178	1.78	80	25.2493	2	1	0	1	1
81	19	2	163	1.63	52	19.5717	1	1	0	1	0	1	0	0	1	0	1	0				1	0	0	1	0
82	27	1	165	1.65	90	33.0579	2	1	1	0	0	1	0	0	1	1	0	0				1	0	0	1	0
83	37	1	172	1.72	67	22.6474	1	1	0	1	0	1	0	1	1	1	0	0				1	0	0	1	0
84	30	1	170	1.7	75	25.9516	1	1	0	1	1
85	40	1	168	1.68	72	25.5102	1	1	1	1	0	1	0	0	0	1	0	0				1	0	0	1	0
86	33	1	173	1.73	73	24.3911	1	0	1	1	1
87	34	1	179	1.79	94	29.3374	1	1	0	1	1
88	22	1	183	1.83	90	26.8745	1	1	0	1	0	0	0	0	0	0	0	0				1	0	0	1	0
89	22	1	187	1.87	84	24.0213	2	1	0	1	0	1	0	0	0	1	0	0				1	0	0	1	0
90	30	1	174	1.74	84	27.7447	2	0	0	1	0	1	1	0	1	1	0	0				1	0	0	1	0
91	51	1	165	1.65	71	26.079	1	0	0	1	1
92	29	2	165	1.65	77	28.2828	2	0	1	1	1
93	45	1	167	1.67	77	27.6095	1	1	0	1	0	0	0	0	0	0	0	0				1	0	0	0	1
94	39	1	173	1.73	85	28.4005	1	1	1	0	0	1	1	1	1	1	0	0				1	0	0	1	0
95	36	1	175	1.75	73	23.8367	2	1	0	1	1
96	22	1	175	1.75	67	21.8776	2	0	0	1	0	0	0	0	0	0	0	0				1	0	0	1	0
97	24	1	188	1.88	113	31.9715	1	1	0	0	0	1	0	0	1	0	0	0				1	0	0	1	1
98	28	1	183	1.83	95	28.3675	1	1	0	1	0	0	0	0	0	0	0	1	1	0	0	1	1	1	0	0
99	23	1	190	1.9	75	20.7756	1	1	1	1	0	0	0	0	0	0	0	0				1	0	0	1	0
100	23	1	174	1.74	60	19.8177	1	1	0	1	0	0	0	0	0	0	0	0				1	0	0	1	0
101	33	1	165	1.65	85	31.2213	1	1	0	0	0	1	0	1	0	1	0	0				0
102	34	1	185	1.85	114	33.309	2	0	1	1	1
103	53	2	150	1.5	75	33.3333	2	1	0	1	0	1	0	1	1	1	0	0				1	0	0	1	0
104	20	1	181	1.81	63	19.2302	2	1	1	1	0	0	0	0	0	0	0	1	0	1	0	0
105	52	2	168	1.68	85	30.1162	2	1	0	1	0	1	0	1	1	1	0	1	0	1	0	1	0	0	1	0
106	44	1	165	1.65	73	26.8136	2	0	0	0	0	1	0	0	1	1	1	0				1	0	0	1	0
107	35	1	197	1.97	106	27.3133	2	1	0	0	0	1	0	0	1	0	0	0				1	0	0	1	0
108	26	1	173	1.73	80	26.7299	1	0	0	1	0	1	0	0	1	0	0	0				1	0	0	1	0
109	32	1	172	1.72	103	34.8161	1	1	1	0	0	1	0	0	1	1	0	0				1	0	0	1	1
110	29	1	174	1.74	64	21.1389	1	1	1	1	0	0	0	0	0	0	0	0				1	0	0	1	0
111	52	1	180	1.8	105	32.4074	2	1	1	0	0	1	0	0	1	1	0	0				1	0	0	1	0
112	55	1	177	1.77	87	27.7698	2	1	1	1	1
113	26	1	178	1.78	78	24.6181	1	1	1	0	0	1	0	0	0	1	0	0				1	0	0	1	0
114	42	1	170	1.7	80	27.6817	1	1	0	1	0	1	0	0	1	1	0	0				1	0	0	1	0
115	32	1	172	1.72	65	21.9713	2	0	1	0	1
116	41	1	176	1.76	70	22.5981	1	0	0	0	0	1	1	0	0	0	0	0				0
117	52	1	182	1.82	98	29.5858	2	1	0	1	1
118	27	1	181	1.81	93	28.3874	2	1	0	1	1
119	26	1	185	1.85	85	24.8356	2	1	0	1	0	1	1	0	1	0	0	0				0
120	27	1	178	1.78	80	25.2493	2	1	1	0	0	1	0	0	0	0	1	0				1	0	1	1	1
121	40	1	170	1.7	80	27.6817	1	0	1	1	0	1	0	0	0	0	1	0				1	0	0	1	0
122	32	1	165	1.65	60	22.0386	1	1	0	1	1
123	36	1	170	1.7	78	26.9896	2	1	1	1	0	1	0	0	0	1	0	0				1	0	0	1	0
124	39	1	178	1.78	75	23.6713	2	1	0	0	0	1	0	0	1	1	0	0				1	0	0	1	0
125	33	1	180	1.8	86	26.5432	2	1	1	0	0	1	0	1	1	1	0	0				1	0	0	1	0
126	42	1	186	1.86	130	37.5766	2	1	1	1	0	1	0	1	0	0	0	0				1	1	0	0	0
127	31	1	184	1.84	82	24.2202	1	1	1	1	0	1	0	1	1	1	0	1	1	0	0	1	0	1	1	0
128	41	1	176	1.76	92	29.7004	1	1	1	1	0	1	0	0	1	1	0	0				1	0	0	1	0
129	41	2	165	1.65	90	33.0579	1	1	0	0	0	1	1	0	1	1	0	0				1	1	0	1	0
130	32	2	152	1.52	68	29.4321	1	0	0	1	0	1	0	0	1	0	0	1	0	1	0	1	1	0	0	0
131	38	1	168	1.68	78	27.6361	2	1	0	1	1
132	33	1	175	1.75	110	35.9184	1	1	0	1	0	1	0	1	0	1	0	0				1	0	0	1	0
133	26	1	183	1.83	92	27.4717	2	1	1	1	0	1	0	0	1	0	1	0				1	0	0	1	1
134	25	1	175	1.75	85	27.7551	1	1	0	0	0	0	0	0	0	0	0	0				1	0	0	1	0
135	35	1	173	1.73	60	20.0474	2	1	1	1	1
136	54	1	164	1.64	110	40.8983	2	1	1	1	0	1	0	0	1	1	0	0				1	1	0	1	0
137	36	1	169	1.69	69	24.1588	1	1	0	0	0	1	0	0	1	1	0	0				1	1	0	1	0
138	33	1	170	1.7	110	38.0623	2	1	1	0	0	0	0	0	0	0	0	0				1	0	0	1	0

## Sheet: Code
Male
Female
Right
left
